# Supplementary material
Source: JCI journal article supplement (doi:10.1172/jci.insight.196651)

Figure 6B.

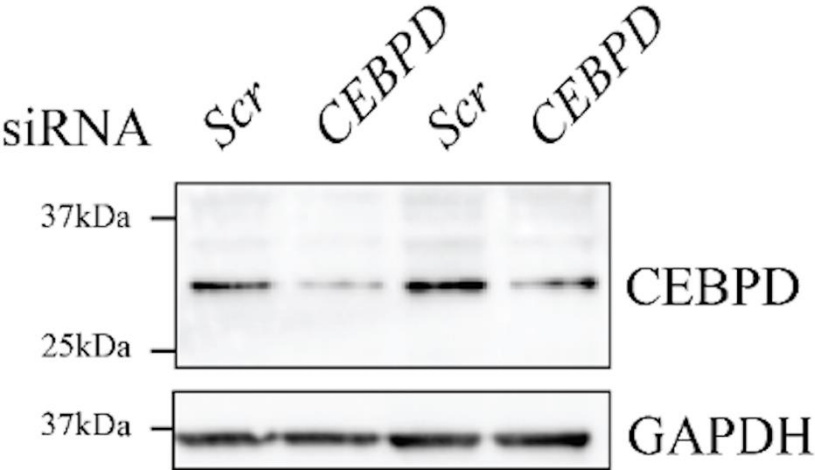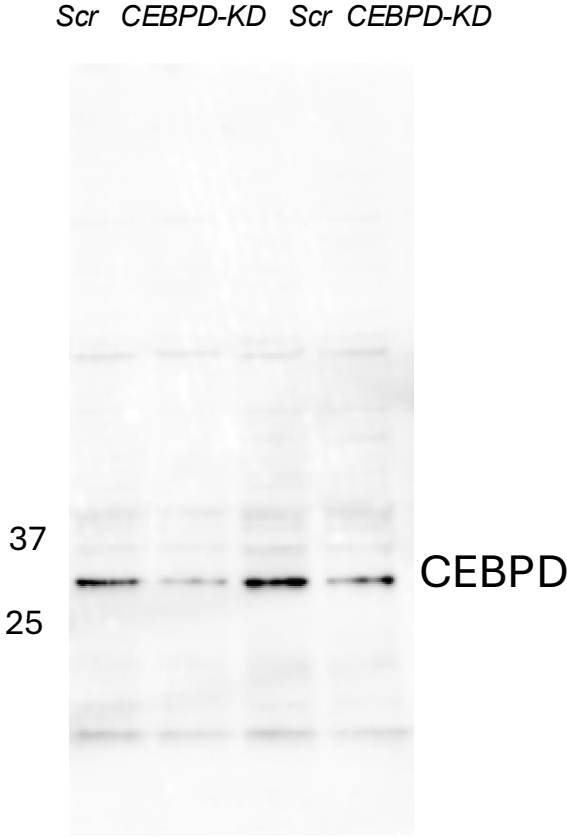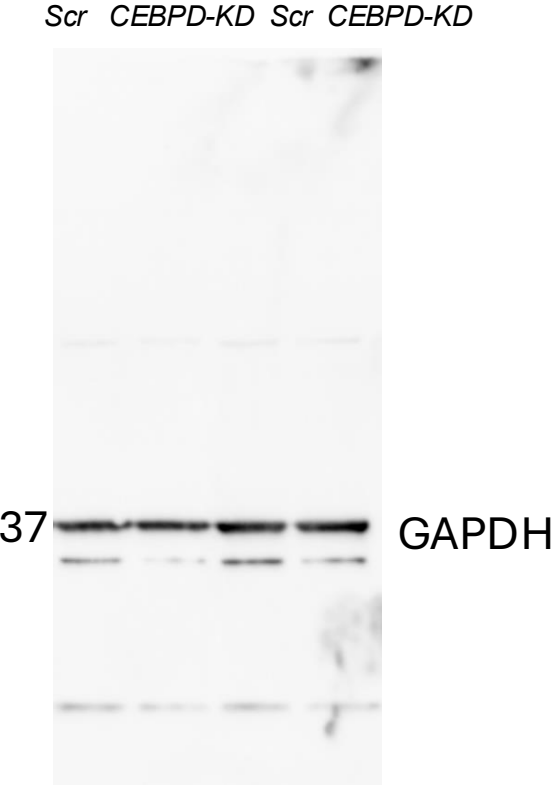

Figure 7A.

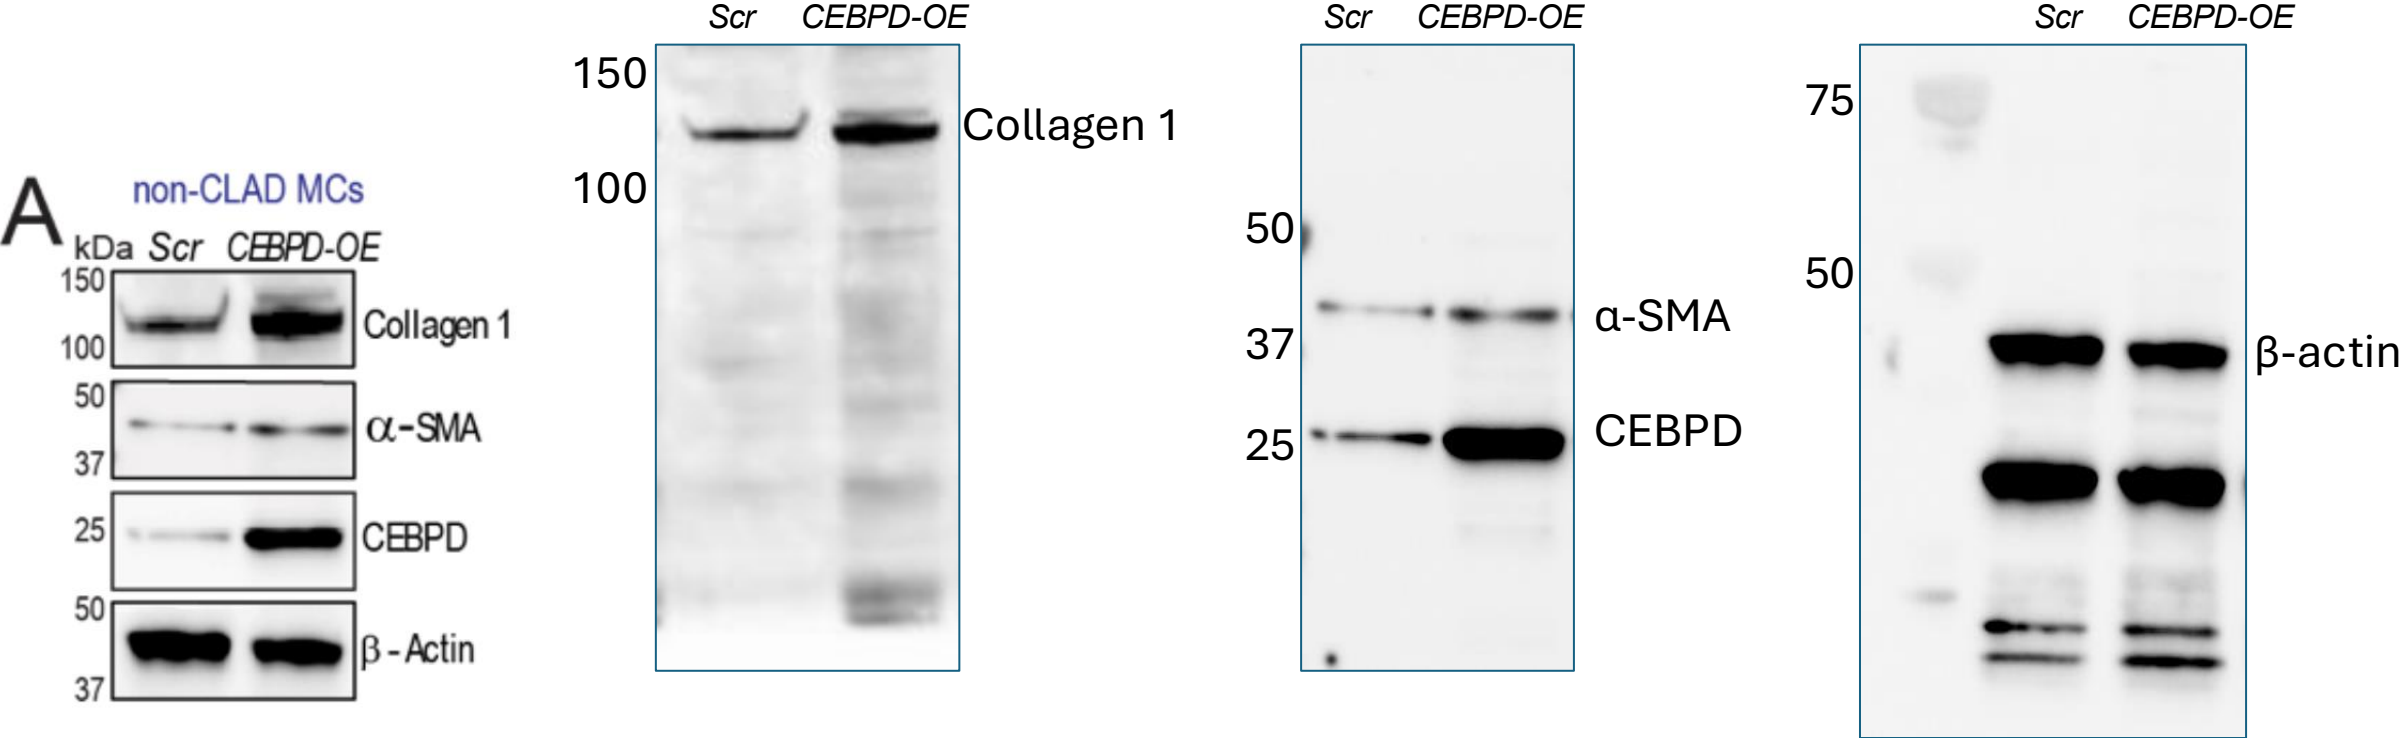

Figure 7B.

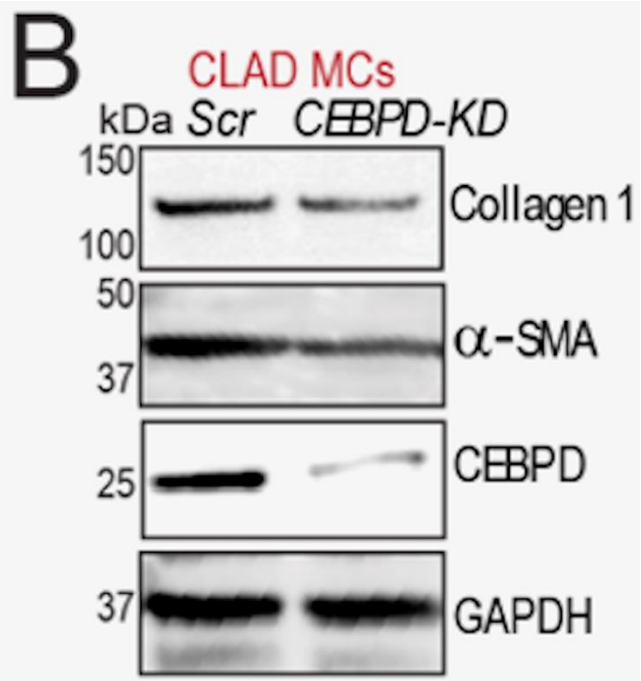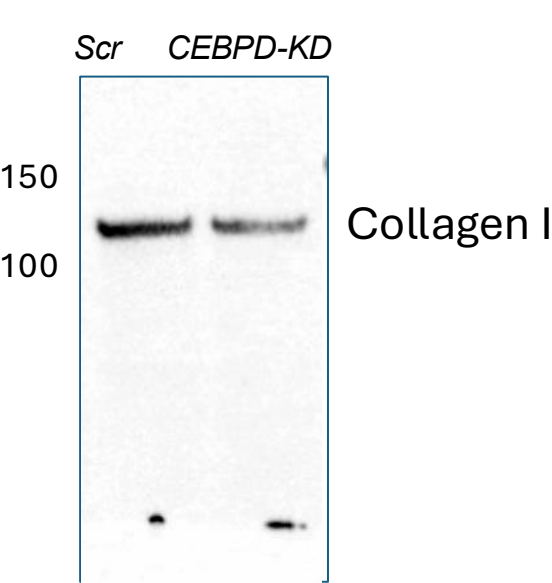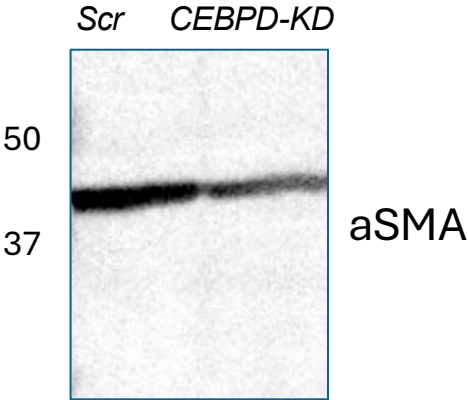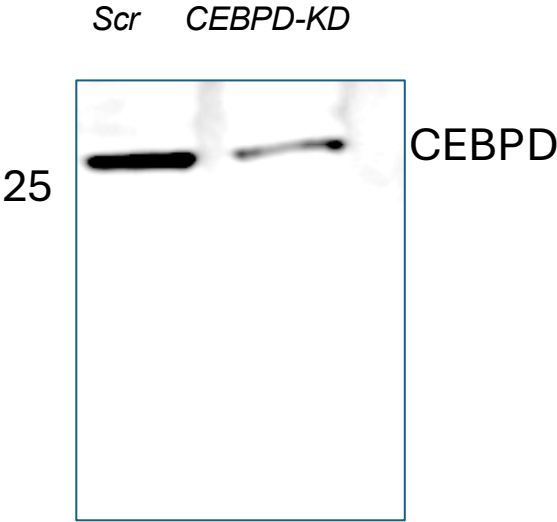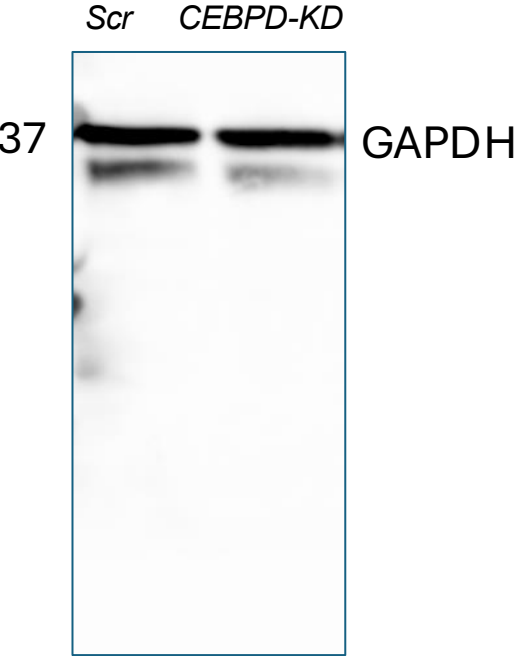

Figure 7E.

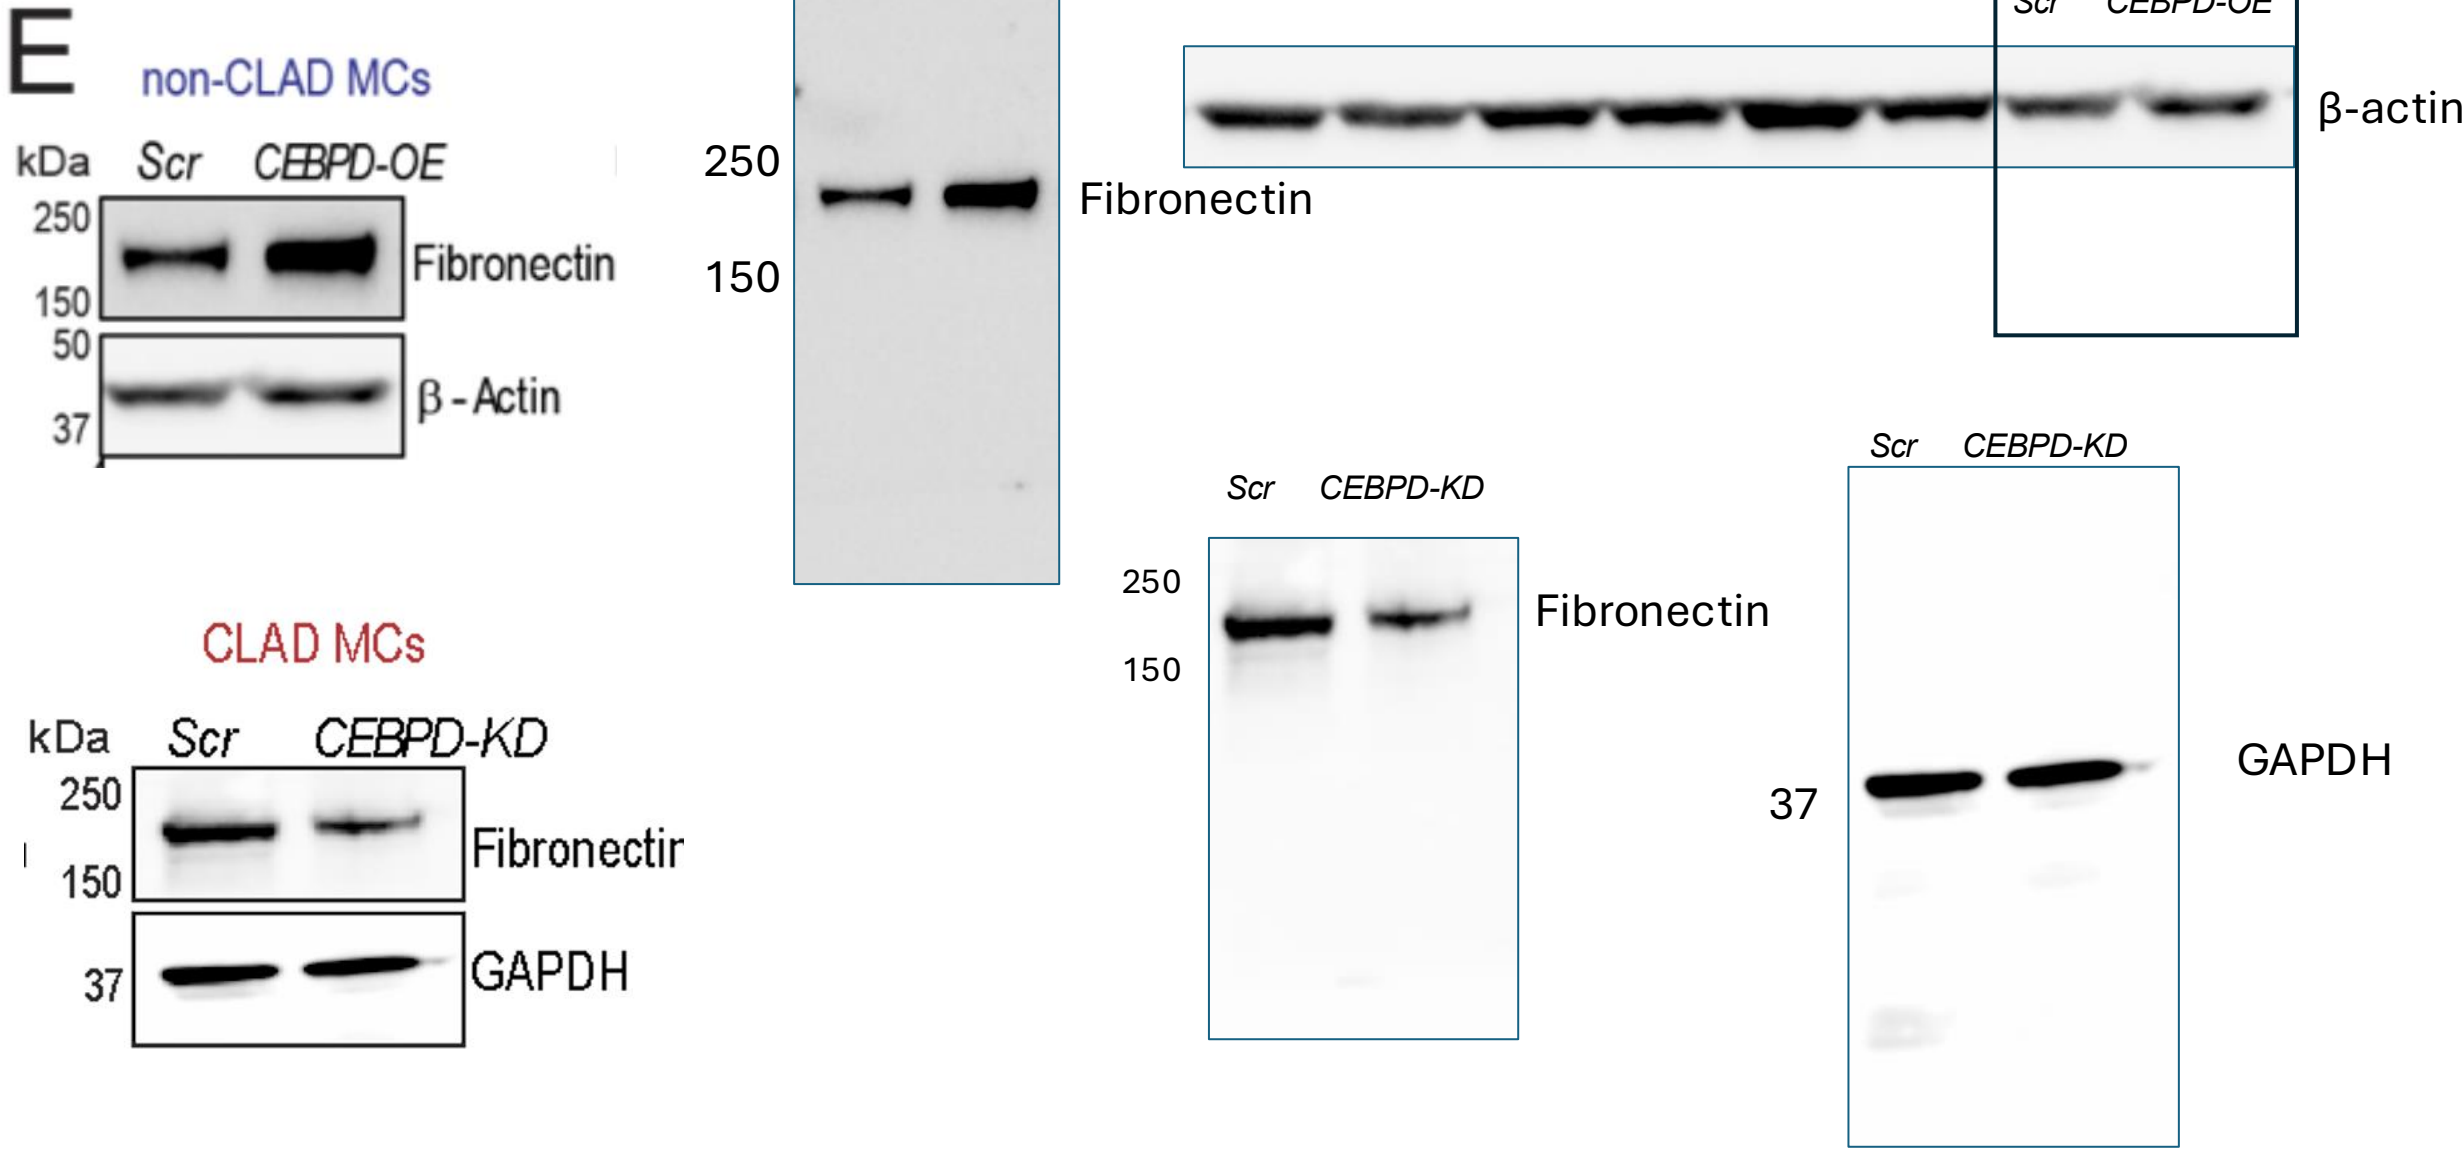

Figure 7H.

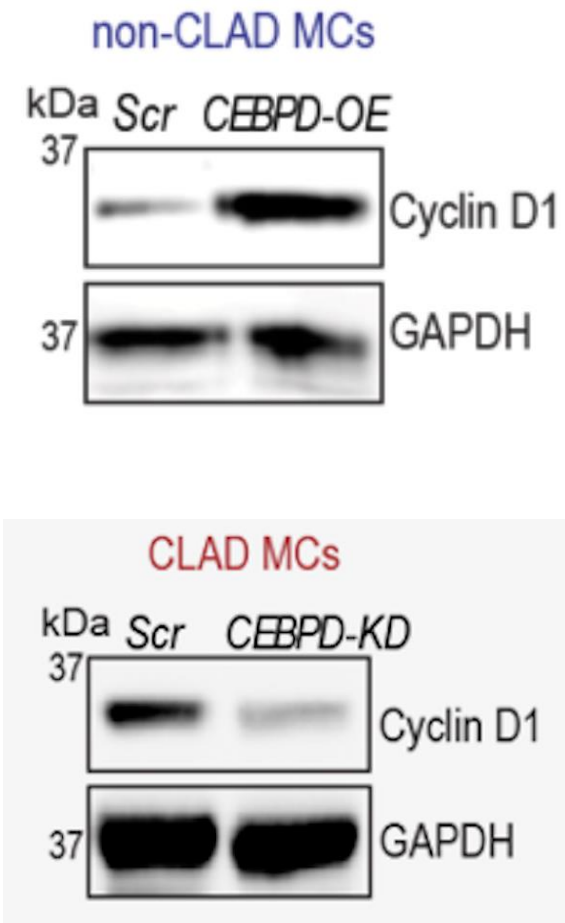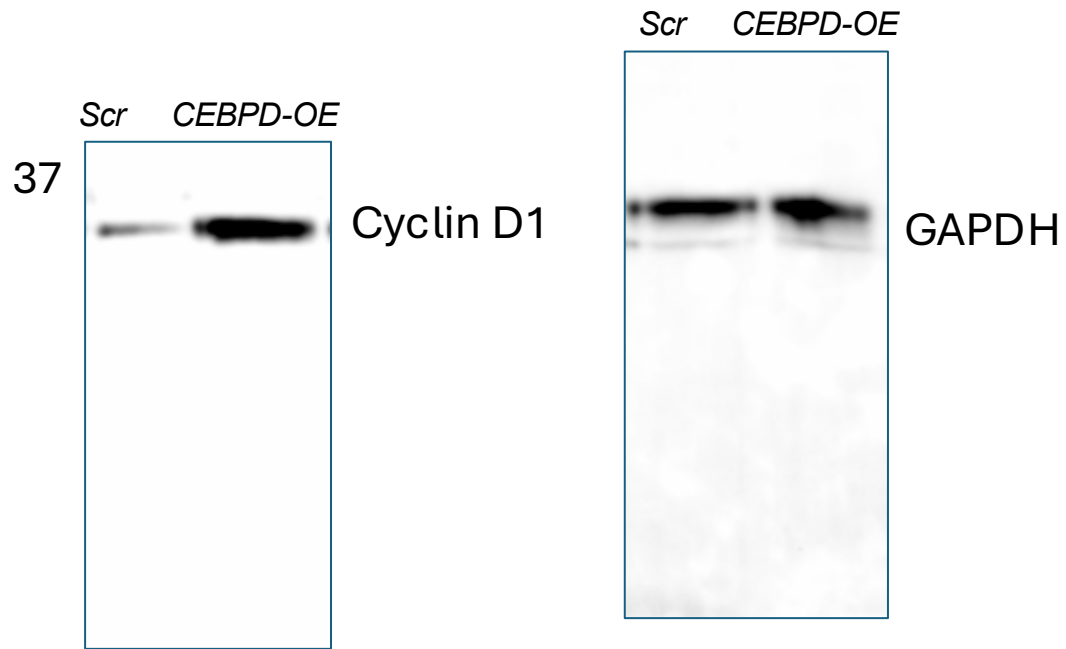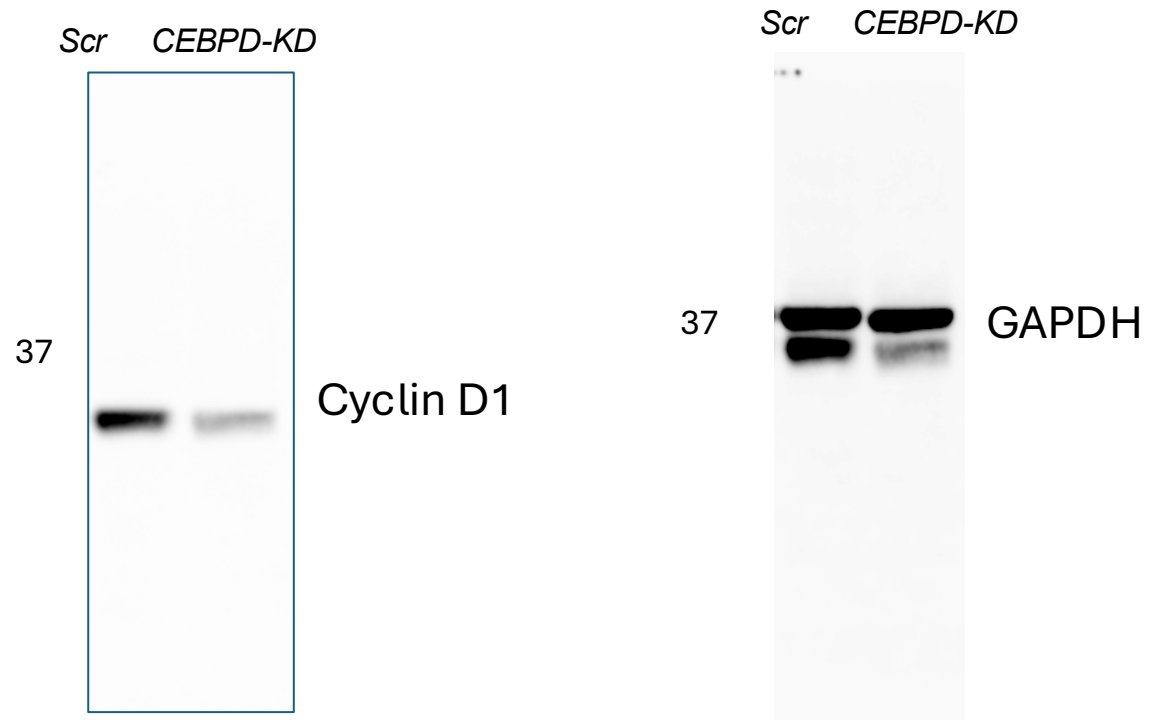

Supplemental Figure 7A

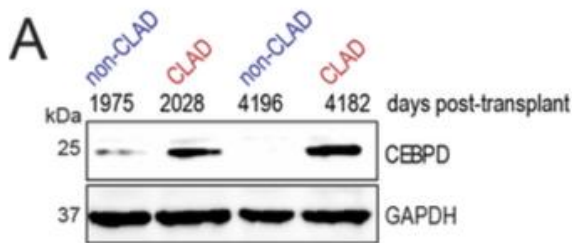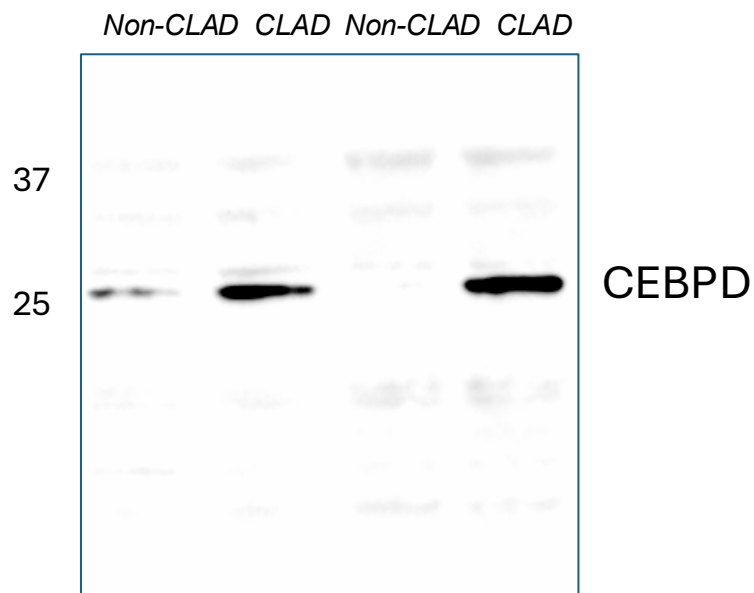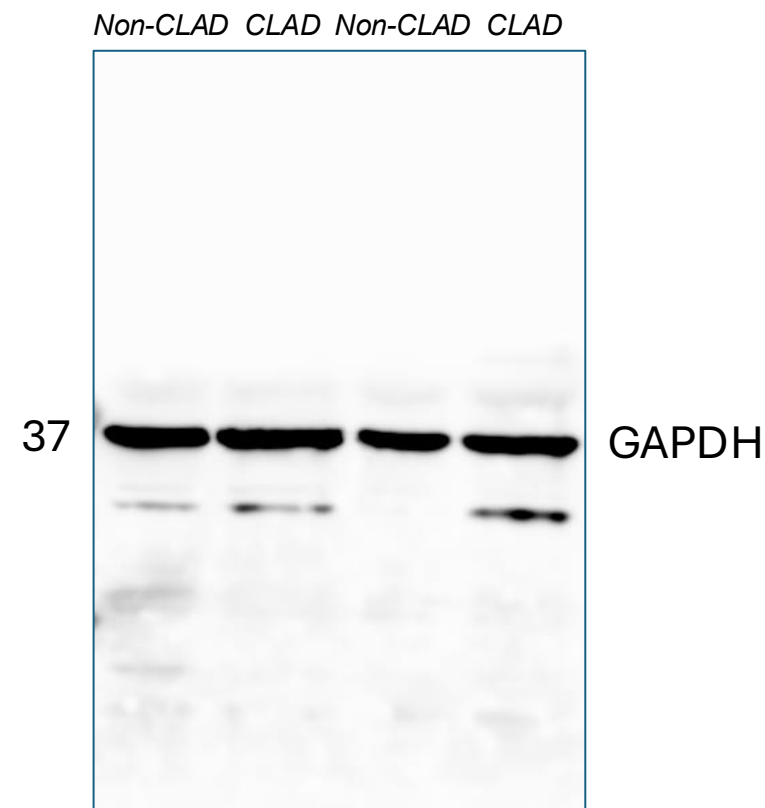

Supplemental Figure 7B

B

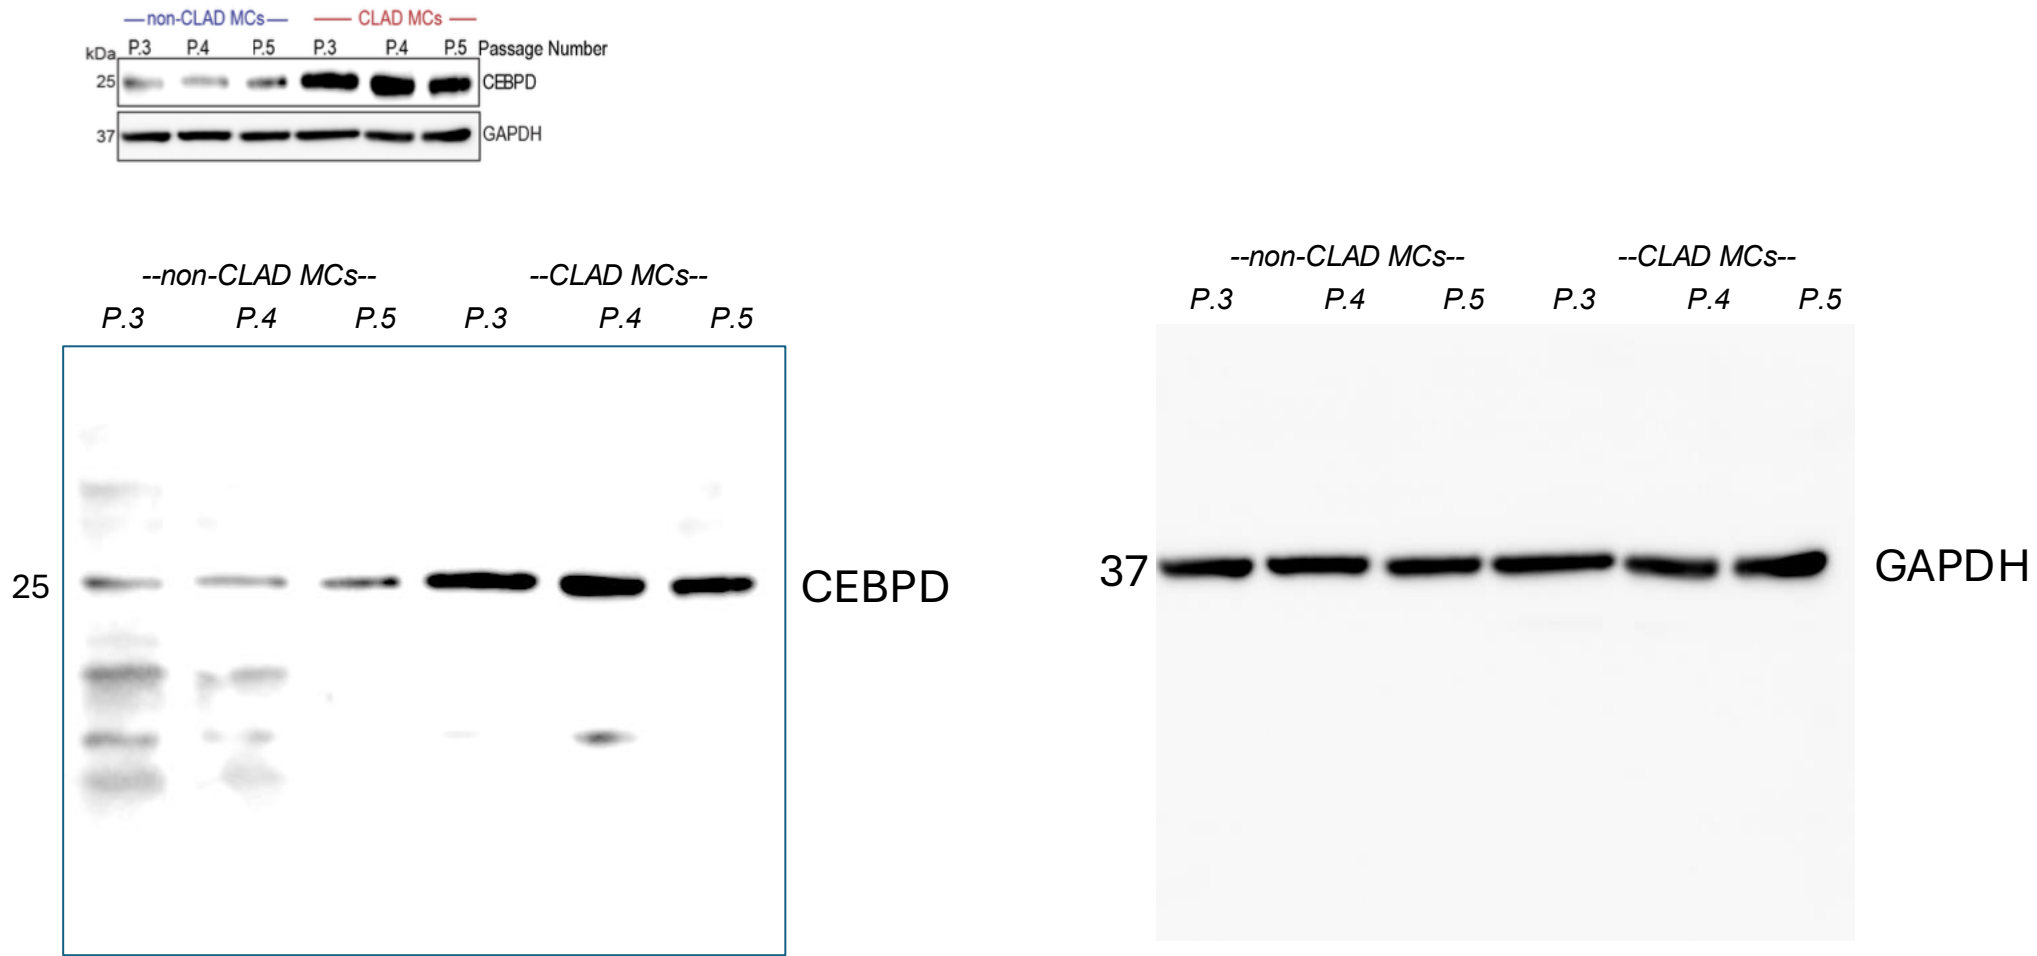

Supplement: sd1 [file 1]
